# Supplementary material
Source: publisher site journal article supplement (https://www.dovepress.com/article/383530)
Supplement: Supplementary file 1 [file get_supplementary_file.php]

**Supplementary materials and methods**

***Cell culture and reagents***

Astrocytes of the U87 cell line were purchased from the American Type Culture Collection (ATCC, Manassas, USA). U87 cells were cultured in Dulbecco’s modified Eagle’s Medium (Invitrogen, New York, USA) containing 10% fetal bovine serum (GIBCO BRL, Grand Island, NY, USA) and 1% penicillin–streptomycin (Hyclone, South Logan, UT, USA) maintained at 37 ℃ under 5% CO2.

Modified Hanks’ balanced salt solution (MHBSS) was prepared to simulate blood plasma, to which was added albumins (Bovine Serum Albumin Fraction V, BioFRoxx, Einhausen, Germany) and Ca2+ (concentrations to 2.4 mmol/L). The electrolyte concentrations were adjusted using CaCl2, MgCl2, KCl, and albumin. The pH and OP were maintained at 7.4 and 300 ± 10 mOsmol/kg, respectively.

Table S1. MHBSS Components

| Stock solution A | NaCl | 160g |
| --- | --- | --- |
| MgSO4·7H2O | 2g |
| KCl | 8g |
| MgCl2·6H2O | 2g |
| CaCl2 | 2.8g |
|  | Dissolve in 1000 ml double distilled water |
| Stock solution B | Na2HPO4·12H2O | 3.04g |
| KH2PO4 | 1.2g |
| glucose | 20.0g |
|  | Dissolve in 1000ml double distilled water |

*Stock A, B and double distilled water were mixed as 1:1:18, autoclaved and adjusted pH to 7.4 with NaHCO3. Albumins were obtained from Bovine Serum Albumin Fraction V, BioFRoxx (Einhausen, Germany). NaCl, KCl,CaCl2,MgCl2,Na2HPO4,NaH2PO4,mannitol and glucose were provided by Solarbio (Beijing, China).

Table S2. Concentrations of electrolytes in Hank’s Balanced salt solution (mmol/L)

| cation | concentration |
| --- | --- |
| Na+ | 137.5988 |
| K+ | 5.8063 |
| Ca2+ | 1.2615 |
| Mg2+ | 0.8976 |

***Probe construction and transfection***

Based on the FRET principle, a glial fibrillary acidic protein (GFAP) fluorescent tension probe was constructed using a cloning kit and restriction enzyme cloning technology.13,30 We constructed fluorescent sensors with circularly permutated cpVenus and cpCerulean (cpVenus–7aa–cpCerulean [cpstFRET]). Constructs were confirmed by DNA sequencing. FRET plasmids were transfected into U87 cells using Lipofectamine 2000 reagent (Invitrogen Life Technologies, Carlsbad, CA, USA) and Opti-MEM™ media (Invitrogen, Carlsbad, CA, USA) according to the manufacturer’s instructions.

***cpstFRET, FRET-AB, and FRAP analyses***

The FRET effectiveness was determined by the dipole angle between donor/eCFP and acceptor/eYFP.13,31-33 After transfection of the GFAP FRET plasmid, cells were photographed with a confocal microscope (SP5; Leica, Wetzlar, Germany). The donor and acceptor were tested using an argon laser at 458 and 514 nm, respectively. The CFP/FRET ratio was calculated using the relationship 1/R = ICerulean donor / IVenus acceptor.

Acceptor photobleaching FRET (FRET-AB) and fluorescence recovery after photobleaching (FRAP) experiments were performed. The overall FRET efficiency was obtained based on the fluorescence intensities of the donor and acceptor before and after bleaching. FRAP was used to detect the ability of fluorescent substances to diffuse and to determine their kinetic properties. All fluorescent molecules in a certain area of the cell were bleached. The fluorescence recovery degree in this period was taken as the FRAP recovery rate of the probe.

***Measurement of cytoplasmic OP and protein particle counts***

Cells under treatment were digested, centrifuged (4 ℃, 13,000 *g*, 5 min), ultrasonicated, and recentrifuged (room temperature, 21000 *g*, 10 min) to obtain cell supernatants, with 50 µL of each being transferred to a test tube. The cytoplasmic OP was assessed using an Osmomat 3000 Freezing Point Osmometer (Gonotec, Berlin, Germany). The number of cytoplasmic nanoparticles (kilocycles per second, Kcps) was determined using a Nanosight NS300 (Malvern Instruments, Malvern, UK).

***Calcium and chloride fluorescence imaging***

Fluo-4 AM and N-6-methoxyquinolyl acetoethylester (MQAE) fluorescent probes were used to perform Ca2+ and Cl- imaging, respectively.34,35 Cells were loaded with the fluorescence probe and detected with Thunder Imager (SP8; Leica). Fluo-4 was detected with excitation at 494 nm and emission at 516 nm, and MQAE was detected with excitation at 355 nm and emission at 460 nm. An increase in intracellular Cl- levels leads to a decrease in MQAE fluorescence value.

***Electrophysiology***

Patch clamp technique was employed to record membrane potential of U87 cells. Cells were plated onto the 9mm glass coverslips at suitable density, mounted in a chamber (Warner Instruments, Hamden, CT; U.S.A.), placed onto the stage of an inverted microscope, and perfused with the required solution. Recordings were obtained at room temperature in the whole-cell configuration.21

For recordings, cells were perfused with a solution containing (in mM): 144 NaCl, 4.3 KCl, 2.5 CaCl2, 1.1 MgCl2, 10 glucose, 10 HEPES, pH 7.3 and mannitol to adjust the osmolality to 300-310 mosmol/kg. Adjusting the concentration of Ca2+, K+ and Alb according to the experimental requirements. The patch electrodes were pulled from borosilicate capillary glass (1.5 mm outer diameter; 0.86 mm inner diameter; Sutter Instruments, USA) with a vertical two-stage pipette puller (P-1000; Narishige). Recordings were performed with glass pipettes (between 3 and 6 MΩ) filled with an intracellular solution comprising (in mM): 140 KCl, 2 MgCl2, 2 Na2ATP, 1 CaCl2, 5 EGTA, 5 glucose (pH 7.3, 290-300 mosmol/kg). All recordings were performed using a Multiclamp 700B amplifier at the data sampling rate of 2 kHz with a Digidata 1550B Digitizer controlled by the PClamp 10.6 software (Molecular Devices, Sunnyvale, CA, U.S.A.).

***Statistical analyses***

FRET ratios were determined using Image J image analysis software, and the results of ion imaging were analyzed semi-quantitatively. GraphPad Prism 7 software was used for statistical processing. Each experiment was repeated at least three times, and the data are expressed as Means ± SEM. Unpaired t-test (two-tailed *P* value) was used to determine the statistical significance, with *P*<0.05 taken as statistically significant.

**Supplementary figure and tables**


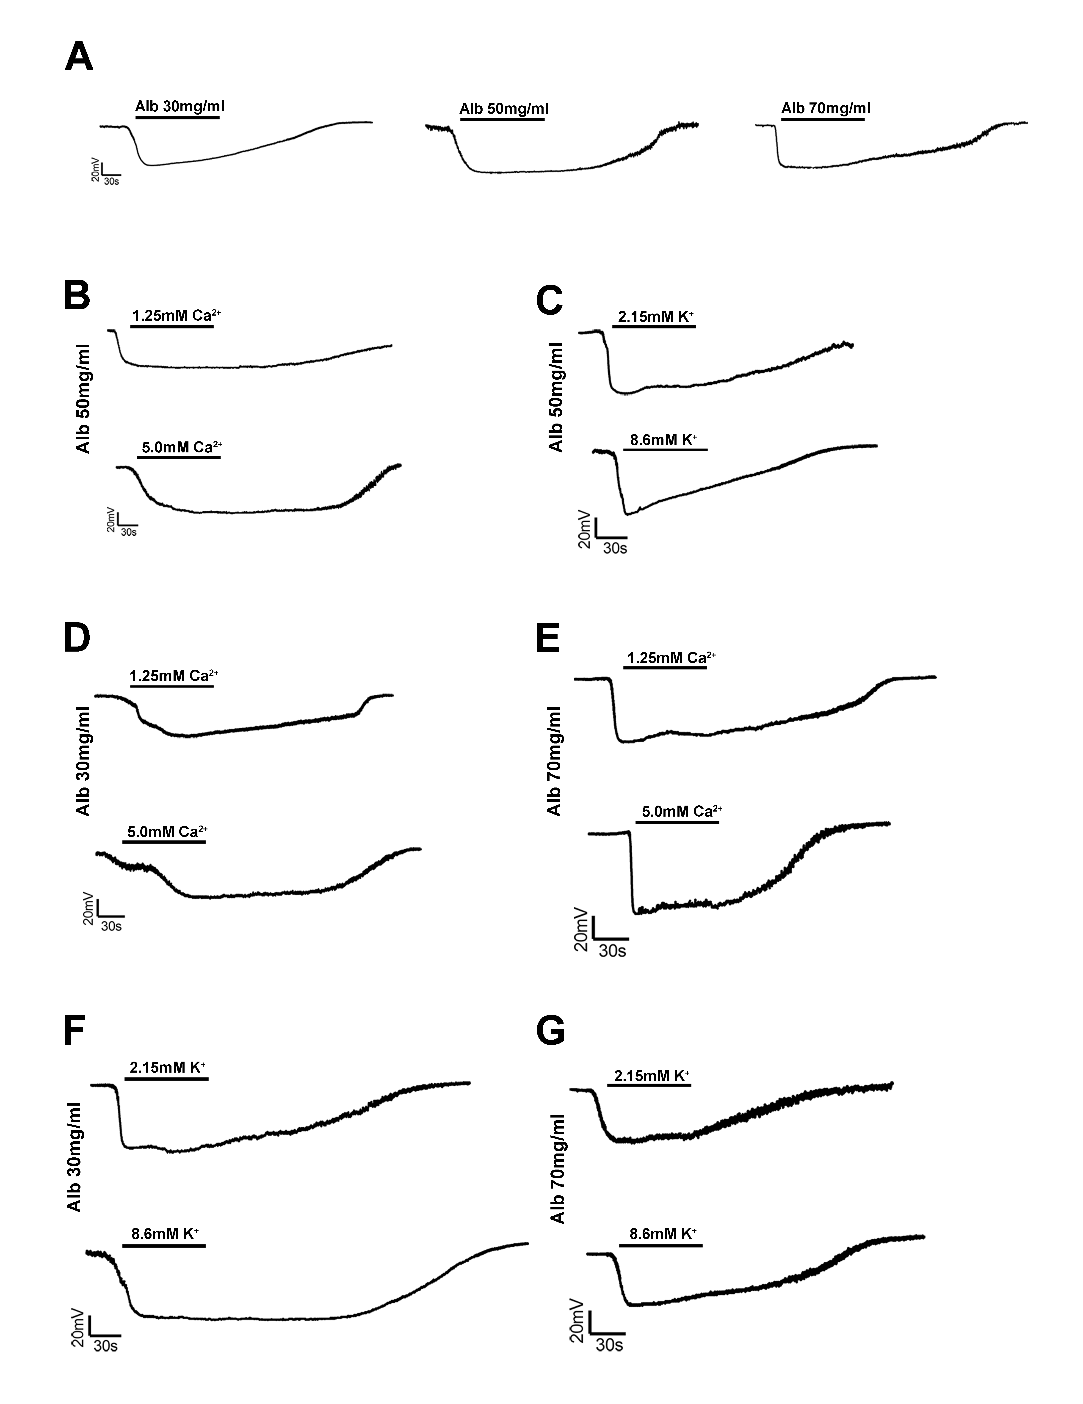


**Figure S1** Representative membrane potential traces measured by the current-clamp mode under treatments of (**A**) normal Ca2+ (2.5 mM), K+ (4.3 mM) and different albumin concentrations (30, 50 and 70 mg/ml), (**B**) 50 mg/ml of albumins and different Ca2+ concentrations, (**C**) 50 mg/ml of albumins and different K+ concentrations, (**D**) 30 mg/ml of albumins and Ca2+, (**E**) 70 mg/ml of albumins and Ca2+, (**F**) 30 mg/ml of albumins and K+, (**G**) 70 mg/ml of albumins and K+. The patch clamp technique was employed to record the membrane potentials of U87 cells at room temperature in whole-cell recordings.
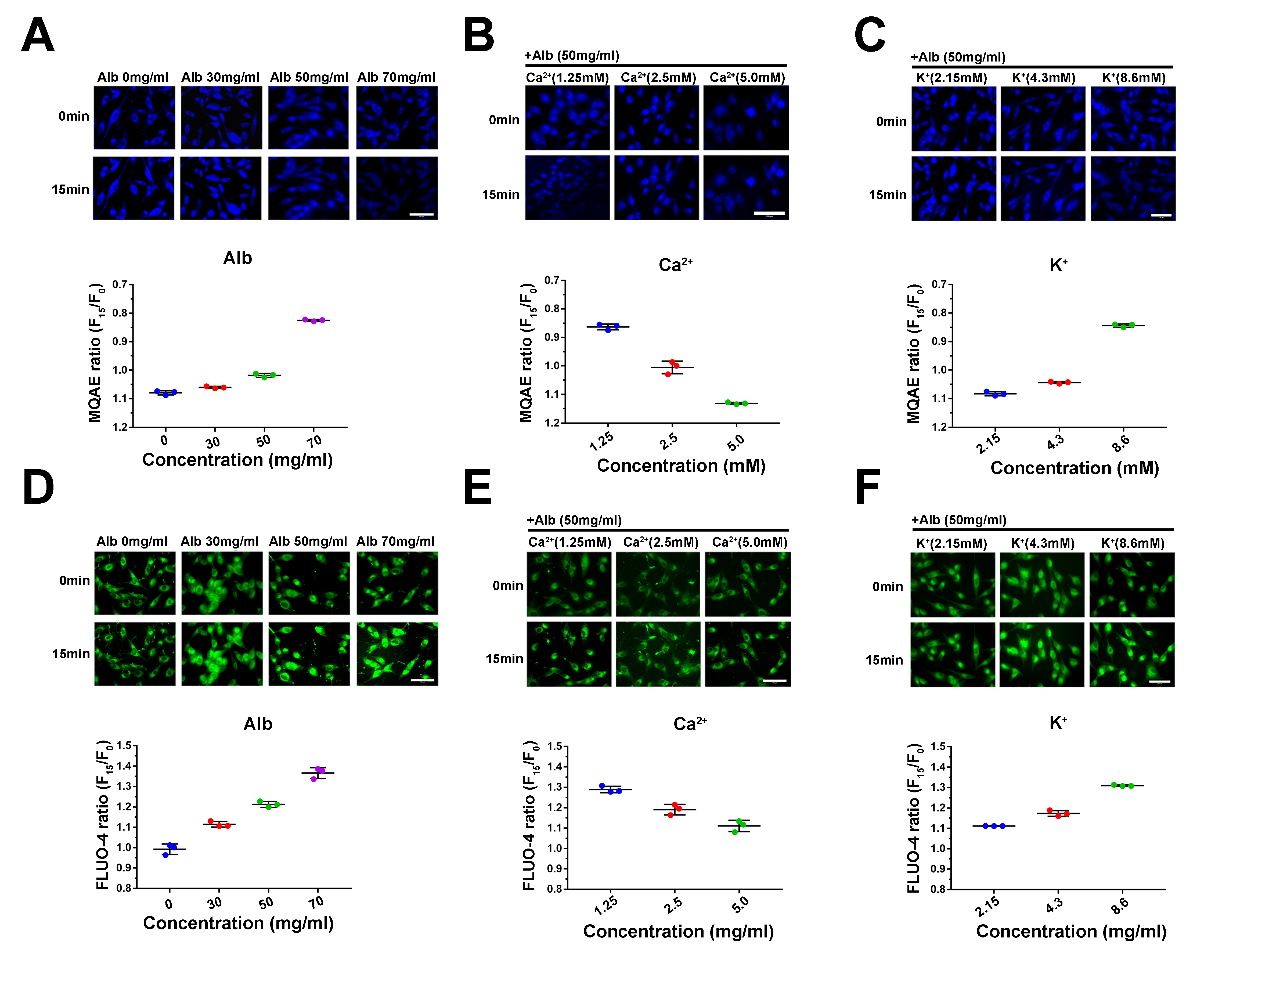


**Figure S2** Extracellular components induce changes in intracellular ion contents. (**A–C**)Chloridion imaging micrographs and traces of relative MQAE fluorescence intensity (F15/F0) under different concentrations of extracellular albumin, Ca2+. and K+. An increase in intracellular Cl- levels leads to a decrease in MQAE fluorescence value. Corresponding to Figure 4J–L. (**D–F**) Calcium imaging micrographs and traces of relative FLUO-4 fluorescence intensity (F15/F0) for cells under different conditions. Corresponding to Figure 4M–O. Scale bar, 100 μm. Data presented as mean ± SEM.

**Table S3. Equation of linear regression and R2 correlation between plasma component concentrations and GFAP tensions**

| Y | Albumins contained | X | X range | [Equation of linear regression](javascript:;) | Correlation（R2） | GFAP trend with X concentrations |
| --- | --- | --- | --- | --- | --- | --- |
| Normalized CFP/FRET ratio | No Alb | NaCl | 98-175 mM | Y= -0.002012X+1.642 | 0.9512 | ↓ |
| Mannitol | 0-205.85 mM | Y= -0.0015X+1.452 | 0.9942 | ↓ |
|  | Alb | 0-100 mg/ml | Y=4E-05X2-0.0015X+0.97 | 0.9469 | ↑ |
|  | 10-100 mg/ml | Y=0.003359X+0.8619 | 0.9499 |
| Alb  (50mg/ml) | Ca2+ | 0-10 mg/ml | Y=0.0134X2 -0.1354X+1.2618 | 0.9627 | ↓ |
| 1.25-2.5 mM | Y=-0.1325X+1.315 | 0.9767 |
| 2.5-5 mM | Y=-0.03642X+1.084 | 0.999 |
| Mg2+ | 0-2.2 mM | Y=0.0492X2 -0.1579X+1.1292 | 0.9839 | ↓ |
| 0-1.1 mM | Y=-0.1073X+1.126 | 0.999 |
| K+ | 0-10 mM | Y=0.03009X+0.857 | 0.9735 | ↑ |
| Na+ | 100-180 mM | Y=-0.006197X + 1.874 | 0.9591 | ↓ |

[Equations of linear regression](javascript:;) were collected from Figure 1, 2 and 3. Alb, albumin; ↑, increase; ↓, decrease.

**Table S4. Equations evaluating blood albumins, Ca2+ and K+ multi-factors regulate PN-OP**

| Y | Compositions | X | X range | [Equation of linear regression](javascript:;) |
| --- | --- | --- | --- | --- |
| Normalized CFP/FRET ratio | Alb and Ca2+ | Ca2+ | 1.25-2.5 mM | Y=XAlb-21.14 XCa -2.44 |
| 2.5-5 mM | Y=XAlb-5.75XCa -39.12 |
| Alb and K+ | K+ | 0-10 mM | Y= XAlb+5.95XK-80.6 |
| K+ and Ca2+ | Ca2+ | 1.25-2.5 mM | Y=XK+3.55XCa-13.14 |
| 2.5-5 mM | Y=XK+0.97XCa-6.97 |
| Alb, K+ and Ca2+ | Ca2+ | 1.25-2.5 mM | YAlb-Ca-K=XAlb-10.57XCa+2.98XK-41.52 |
| Ca2+ | 2.5-5 mM | YAlb-Ca-K=XAlb-2.88XCa+2.98XK -59.86 |

Equations of linear regression of two or three factors derivate according to the CFP/FRET ratio of albumin (Alb)-Ca2+-K+ in the conditions of osmotic equilibrium (Figure 5, 6 and 7).

**Table S5. Clinical symptoms derived from plasma components induce synergistic and antagonistic effects**

| Hemodynamic disorders | Clinical symptoms |
| --- | --- |
| Hypercalcemia | Plasma hyperosmolarity, polydipsia, disabled urine concentration, urorrhagia, body dehydration |
| Hypoalbuminemia and hypocalcemia | Osmotic equilibrium (ALB-Ca2+ negative correlation, antagonistic effects) |
| Hypocalcemia with albumin supplement | Plasma hypoosmolarity, diuresis and rapid water output, edema anesis |
| Synchronous supplement of plasma albumins and calcium | Isotonic state, disability in water output and the failed edema therapy |
| Hyperkalemia | Plasma hypoosmolarity, accompanied with loss of albumins, maintain the osmotic equilibrium |
| Hypokalemia and hypoalbuminemia | Plasma hyperosmolarity (ALB-K+ positive correlation), polydipsia, inhibition of antidiuretic hormone, anasarca |
| Saline infusion | No interplay between sodium and albumin in regulating plasma OP |
